# Supplementary material for: Community-engaged research in HIV implementation science: A cross-sectional assessment of meaningful engagement among community and academic recipients of 2021 and 2022 ‘ending the HIV epidemic’ supplement awards
Source: Research Square preprint supplement (doi:10.21203/rs.3.rs-8554220/v1), 2026-01-22
Supplement: Supplementary file 1 [file 7d6a59366aa3c60169301c25.docx]

Supplemental Materials

**S1. Complete Community-engaged Research Survey**

Academic-community partnerships vary, involving a range of structures, roles and responsibilities. We want to assess your perceptions of meaningful engagement in your EHE academic-community partnership activities. We will ask about your experience engaging in academic-community partnerships and your organization’s role in your EHE-supported project.

Thank you for sharing your thoughts with us. The research team will compile these data across partnerships for analysis and will NOT report your project title, your organization name, or your academic/community partner. Your responses will be shared in such a way that they are not identifiably linked to your individual EHE grant, study, or project.

Introductory Questions:

1. Prior to starting your EHE-supported academic-community partnership, approximately how many previous community-academic research partnerships had you personally engaged in (as a part of your current organization or any other)?___________
2. Please provide the title of your EHE-supported project.

___________________________________________________________________________

1. Is your organization the academic or community entity of your partnership?
   1. Academic
   2. Community
   3. Other (please describe): __________________________________

[Branching logic to determine which figure appears in next question]

1. There are many different styles of community-academic partnerships. Which style is the right fit for your partnership depends on many factors and will differ between partnerships. The figure below presents seven different styles of community-academic partnerships, ranging from “no community involvement” to “community driven/lead.” Under each style heading, example activities and perspectives are shown. Please select the level of community engagement that best represents your experience.

If “Community partner” selected:

4a. What level of involvement best represents how you thought your partnership would work when you started your EHE award activities?

|  | **No Community Involvement** | **Community Informed** | **Community Consultation** | **Community Participation** | **Community Initiated** | **Community-based Participatory Research** | **Community Driven/Lead** |
| --- | --- | --- | --- | --- | --- | --- | --- |
| **Community Involvement Activity** | Community is not included in any aspects of the research | Community informs the research and may or may not be informed or included (or know they’re informing) | Community provides input and feedback to researchers to inform the research | Community has some active role in the research | Community initiates the research agenda/priorities | Community shares equally in decision-making and ownership | Community leads and owns the research |
| **Community Perspective/Experience** | *We do not know about this project* | *We may or may not be aware of this project, but our information informed it* | *Researchers met with us to present the project and asked for our input* | *Researchers provided opportunities for us to participate (e.g., recruitment, community advisory board)* | *We told researchers what questions we need answers for* | *We participated in all aspects, equitably* | *We fully own the research* |

4b. What level of involvement best represents your actual experience of your community partnership to date?

|  | **No Community Involvement** | **Community Informed** | **Community Consultation** | **Community Participation** | **Community Initiated** | **Community-based Participatory Research** | **Community Driven/Lead** |
| --- | --- | --- | --- | --- | --- | --- | --- |
| **Community Involvement Activity** | Community is not included in any aspects of the research | Community informs the research and may or may not be informed or included (or know they’re informing) | Community provides input and feedback to researchers to inform the research | Community has some active role in the research | Community initiates the research agenda/priorities | Community shares equally in decision-making and ownership | Community leads and owns the research |
| **Community Perspective/Experience** | *We do not know about this project* | *We may or may not be aware of this project, but our information informed it* | *Researchers met with us to present the project and asked for our input* | *Researchers provided opportunities for us to participate (e.g., recruitment, community advisory board)* | *We told researchers what questions we need answers for* | *We participated in all aspects, equitably* | *We fully own the research* |

If “academic partner” selected:

4a. What level of involvement best represents how you thought your partnership would work when you started your EHE award activities?

|  | **No Community Involvement** | **Community Informed** | **Community Consultation** | **Community Participation** | **Community Initiated** | **Community-based Participatory Research** | **Community Driven/Lead** |
| --- | --- | --- | --- | --- | --- | --- | --- |
| **Researcher Involvement Activity** | Researcher works independent of community | Information is gleaned from the community which informs the research ‘ear hustling’ | Researcher consults with community and includes community in the research (front end or back end) | Researcher includes community in the research in a defined role | Researcher responds to specific needs or asks from community | Researcher shares equally in decision-making and ownership with community | Researcher supports community identified research efforts or serves no role. |
| **Researcher Perspective/Experience** | *We had no contact with the community.* | *We sat in on a meeting and learned a great deal* | *We met with several community organization staff,* | *We have a defined roles for community to participate in the research* | *We created the research in response to community identified issue(s)/question(s)* | *We developed the project together with community partners* | *The community is in charge and we support their efforts when asked.* |

4b. What level of involvement best represents your actual experience of your community partnership to date?

|  | **No Community Involvement** | **Community Informed** | **Community Consultation** | **Community Participation** | **Community Initiated** | **Community-based Participatory Research** | **Community Driven/Lead** |
| --- | --- | --- | --- | --- | --- | --- | --- |
| **Researcher Involvement Activity** | Researcher works independent of community | Information is gleaned from the community which informs the research ‘ear hustling’ | Researcher consults with community and includes community in the research (front end or back end) | Researcher includes community in the research in a defined role | Researcher responds to specific needs or asks from community | Researcher shares equally in decision-making and ownership with community | Researcher supports community identified research efforts or serves no role. |
| **Researcher Perspective/Experience** | *We had no contact with the community.* | *We sat in on a meeting and learned a great deal* | *We met with several community organization,* | *We have a defined roles for community to participate in the research* | *We created the research in response to community identified issue(s)/question(s)* | *We developed the project together with community partners* | *The community is in charge and we support their efforts when asked.* |

Figure: **The Continuum of Community Engagement in Research: Perspective and Experience** Adapted from: Key, K. D., Furr-Holden, D., Lewis, E. Y., Cunningham, R., Zimmerman, M. A., Johnson-Lawrence, V., & Selig, S. (2019). The continuum of community engagement in research: A roadmap for understanding and assessing progress. *Progress in community health partnerships: research, education, and action*, *13*(4), 427-434.

1. For how long has the academic-community partnership implementing this EHE-supported project been going on (including this specific EHE-supported project and any prior collaborations)? ___ (years)

Based on your partnership experience, please rate **how often** the following events occurred as well as the **quality of engagement** for each event:

**Response options for each item:**

1. **How often:** Never, Rarely, Sometimes, Most of the Time, Always, N/A
2. **Quality of engagement**: Poor, Fair, Good, Very Good, Excellent, N/A

**SEEK AND USE THE INPUT OF COMMUNITY PARTNERS**

1. Community members were asked to provide input.
2. Ideas and input of community members were used.
3. As a result of community input, plans were changed.
4. Community members were involved in making key decisions.
5. Community members were asked to help with specific tasks.

**FOSTER CO-LEARNING, CAPACITY BUILDING, AND CO-BENEFIT FOR ALL PARTNERS**

1. Academic partners reported learning from community members.
2. Community members reported learning from academic partners.
3. Community members gained important skills from their involvement.
4. Academic and community partners were encouraged to learn from each other.
5. Community partners were supported to get what they needed from academic partners.
6. Academic partners were supported to get what they needed from community partners.
7. Academic partners helped community members achieve social, educational, or economic goals.
8. Community partners helped academic partners achieve social relationships and mutual respect.

**FACILITATE COLLABORATIVE, EQUITABLE PARTNERS**

1. Community members were supported to collaborate as real partners.
2. Disagreements were handled fairly.
3. Academic partners demonstrated that community members are really needed to do a good job.
4. Academic partners demonstrated that inclusion of community members’ ideas make things better.
5. Community members were enabled to voice disagreements.

**INTEGRATE AND ACHIEVE A BALANCE OF ALL PARTNERS**

1. All people involved were enabled to voice their views.
2. Final decisions reflected the ideas of everyone involved.
3. Academic partners demonstrated that community members’ ideas are just as important as academics’ ideas.
4. Community members’ ideas were treated with openness and respect.

**INVOLVE ALL PARTNERS IN THE DISSEMINATION PROCESS**

1. All partners were involved with sharing findings.
2. Community members were included in plans for sharing findings.
3. Community members were involved in sharing health messages in community settings.
4. Community members were involved in planning dissemination activities.

**DISSEMINATE FINDINGS AND KNOWLEDGE GAINED TO ALL PARTNERS**

1. Community members were informed about what was going on with the project.
2. Community members received help with problems of their own.
3. Community members were empowered with knowledge gained from a joint activity.
4. Findings and information were given to community members.
5. Community members received help in disseminating information using community publications.
6. Are there any other components of meaningful engagement that you think should be included or addressed in this survey? If so, please describe:

Next, please think about the extent to which community partners participated in the research component of this project. For each of the following research activities, think about **the extent to which community partners participated in the research component of this partnered project** and check all the research activities that they have been involved with either as “consultants” or “active participants.”

**Response options:**

**Extent of engagement:** Did not participate; Consulted on; Were actively engaged in; N/A

1. Grant proposal writing
2. Background research
3. Choosing research methods
4. Developing sampling procedures
5. Recruiting study participants
6. Implementing the intervention
7. Designing interview and/or survey questions
8. Collecting primary data
9. Analyzing collected data
10. Interpreting study findings
11. Writing reports and journal articles
12. Giving presentations at meetings and conferences
13. Are there any other components of the research process that should be included or addressed in this survey? If so, please describe:

We want to measure feelings of trust within academic-community partnerships. For each of the components of trust, please rate **how important the component is to your organization** as well as the **quality with which each component was applied in your partnership:**

**Response options:**

**Importance:** Not at all important, Little importance, Neutral, Important, Very important

**Quality of application**: Poor, Fair, Good, Very Good, Excellent

1. Accessibility (Meaning: Partners were accessible or approachable)
2. Dependability (Meaning: Partners followed through on promises or commitments)
3. Good/clear communication (Meaning: Partners share information; promote clear understanding)
4. Mutual benefit (Meaning: There is balance in the relationship; I do things to help them and they do things to help me)
5. Open (Meaning: Partners are willing to listen to the ideas of others)
6. Provides accurate information (Meaning: Partners can be relied upon to provide correct information)
7. Relationship building (Meaning: Partners spend time in the community; engage with partners)
8. Responsible (Meaning: Partners can be counted on):
9. Shares power/responsibilities (Meaning: Partners share decision making)
10. Supportive (Meaning: Partners are helpful)
11. Truthful (Meaning: Partners are honest)
12. Values differences (Meaning: Partners have respect for race, power, and class differences; are aware of cultural issues)
13. Other (fill in blank) à *up to 3*
14. Are there any other components of trust in CEnR that should be included or addressed in this survey? If so, please describe:

**Demographic Questions:**

1. Please provide your age (in years):
2. Please indicate the gender with which you identify:
   1. Male
   2. Female
   3. Non-binary
   4. Transgender man/trans man
   5. Transgender woman/trans woman
   6. Additional gender category (please specify): _________
   7. Decline to answer
3. Please indicate your highest education level
   1. High school, no diploma
   2. High school diploma
   3. 1 or more years of college, no degree
   4. Associate degree
   5. Bachelor’s Degree
   6. Graduate School Degree
4. Race:
   1. Asian
   2. Black or African American
   3. White
   4. American Indian or Alaska Native
   5. Native Hawaiian or Other Pacific Islander
   6. Two or more races
   7. Decline to answer
5. Ethnicity:
   1. Hispanic or Latino
   2. Not Hispanic or Latino
   3. Decline to answer
6. Length of time working with the organization engaged in this EHE work? ____(years, decimal if less than 1 year)
   1. Decline to answer

Please provide an email address to which you would like to receive your $50 electronic gift card

---------------------------------------------------------------------------------------------------------------------

**S2: Demographics: Subset including responses from one academic partner and at least one community partner of the same project**

|  | **Academic (n=22)** | | **Community (n=26)** | | **Total (N=48)** | |
| --- | --- | --- | --- | --- | --- | --- |
| **Participant Characteristics** | n | (%) | n | (%) | n | (%) |
| **Age (Median; [IQR])** | 40 | [35, 43] | 39 | [35, 43] | 39 | [35, 43] |
| **Race** |  |  |  |  |  |  |
| **American Indian or Alaska Native** | 0 | (0.0) | 1 | (3.8) | 1 | (2.1) |
| **Asian** | 3 | (13.6) | 1 | (3.8) | 4 | (8.3) |
| **Black or African American** | 1 | (4.5) | 4 | (15.4) | 5 | (10.4) |
| **White** | 16 | (72.8) | 11 | (42.3) | 27 | (56.3) |
| **Native Hawaiian or Pacific Islander** | 0 | (0.0) | 0 | (0.0) | 0 | (0.0) |
| **Multiple Races** | 2 | (9.1) | 7 | (27.0) | 9 | (18.7) |
| **N/A** | 0 | (0.0) | 2 | (7.7) | 2 | (4.2) |
| **Ethnicity** |  |  |  |  |  |  |
| **Hispanic** | 3 | (13.6) | 12 | (46.2) | 15 | (31.3) |
| **Non-Hispanic** | 19 | (86.4) | 14 | (53.8) | 33 | (68.7) |
| **N/A** | 0 | (0.0) | 0 | (0.0) | 0 | (0.0) |
| **Gender** |  |  |  |  |  |  |
| **Female** | 14 | (63.6) | 13 | (50.0) | 27 | (56.2) |
| **Male** | 8 | (36.4) | 11 | (42.3) | 19 | (39.6) |
| **Non-binary** | 0 | (0.0) | 0 | (0.0) | 0 | (0.0) |
| **Transgender man** | 0 | (0.0) | 0 | (0.0) | 0 | (0.0) |
| **Transgender woman** | 0 | (0.0) | 2 | (7.7) | 2 | (4.2) |
| **N/A** | 0 | (0.0) | 0 | (0.0) | 0 | (0.0) |
| **Education** |  |  |  |  |  |  |
| **High school no diploma** | 1 | (4.5) | 0 | (0.0) | 1 | (2.1) |
| **High school diploma** | 0 | (0.0) | 2 | (7.7) | 2 | (4.2) |
| **> 1 yr(s) of college no degree** | 0 | (0.0) | 6 | (23.1) | 6 | (12.5) |
| **Bachelor's degree** | 1 | (4.5) | 6 | (23.1) | 7 | (14.6) |
| **Graduate degree** | 20 | (91.0) | 12 | (46.1) | 32 | (66.6) |
| **N/A** | 0 | (0.0) | 0 | (0.0) | 0 | (0.0) |

IQR: interquartile range

N/A: Not available

**S3. Differences in Engagement Principle quality and frequency scores between academic partners and community partners**

|  | **Academic (n=52)*** | | | **Community (n=29)** | | | **Difference** | |
| --- | --- | --- | --- | --- | --- | --- | --- | --- |
| Engagement Principles | **Median** | **25%** | **75%** | **Median** | **25%** | **75%** | **z-score** | **p-value** |
| Quality | | | | | | | | |
| Seek and Use the Input of Community Partners | 4.00 | 3.40 | 4.60 | 4.20 | 3.20 | 5.00 | -1.04 | 0.30 |
| Foster Co-Learning, Capacity Building, and Co-Benefit for All Partners | 3.92 | 3.00 | 4.50 | 4.50 | 3.83 | 5.00 | -2.63 | 0.01 |
| Facilitate Collaborative, Equitable Partners | 4.00 | 3.20 | 4.50 | 4.40 | 3.00 | 5.00 | -1.49 | 0.14 |
| Integrate and Achieve a Balance of All Partners | 4.25 | 3.88 | 4.75 | 4.50 | 3.75 | 5.00 | -1.07 | 0.29 |
| Involve All Partners in the Dissemination Process | 3.00 | 1.25 | 3.88 | 4.00 | 2.75 | 5.00 | -2.42 | 0.02 |
| Disseminate Findings and Knowledge Gained to All Partners | 3.00 | 1.90 | 3.90 | 3.40 | 2.80 | 4.60 | -1.67 | 0.10 |
| Total Quality Score | **3.59** | **3.02** | **4.05** | **4.13** | **3.46** | **4.74** | **-2.10** | **0.04** |
| Frequency | | | | | | | | |
| Seek and Use the Input of Community Partners | 4.00 | 3.60 | 4.50 | 4.20 | 3.8 | 4.8 | -1.73 | 0.08 |
| Foster Co-Learning, Capacity Building, and Co-benefit for All Partners | 3.92 | 3.25 | 4.50 | 4.50 | 3.5 | 4.67 | -2.60 | 0.01 |
| Facilitate Collaborative, Equitable Partners | 4.0 | 3.60 | 4.60 | 4.60 | 3.80 | 5.00 | -1.70 | 0.09 |
| Integrate and Achieve a Balance of All Partners | 4.75 | 4.25 | 5.00 | 5.00 | 4.50 | 5.00 | -1.47 | 0.14 |
| Involve All Partners in the Dissemination Process | 3.25 | 1.25 | 4.25 | 4.50 | 3.00 | 5.00 | -2.45 | 0.01 |
| Disseminate Findings and Knowledge Gained to All Partners | 3.40 | 2.20 | 4.00 | 3.80 | 3.00 | 4.80 | -2.00 | 0.05 |
| Total Frequency Score | **3.76** | **3.28** | **4.19** | **4.28** | **3.48** | **4.73** | **-2.42** | **0.02** |

*1 missing (no response)

**S4. Sensitivity Analysis: Subset of data excluding participants that did not report ANY dissemination engagement**

|  | **Academic (n=31)** | | **Community (n=23)** | | | |
| --- | --- | --- | --- | --- | --- | --- |
| **Engagement Principles** | **Median** | **IQR** | **Median** | **IQR** | | **z-score** | | **p-value** | |
| **Frequency** |  |  |  |  | | |  |  |  |
| Involve All Partners in the Dissemination Process | 3.88 | 1.25 | 4.63 | 2.00 | | | -1.75 | 0.08 | |
| Disseminate Findings and Knowledge Gained to All Partners | 3.60 | 0.90 | 4.00 | 1.80 | | | -1.27 | 0.21 | |
| **Quality** |  |  |  |  | | |  |  |  |
| Involve All Partners in the Dissemination Process | 3.25 | 1.38 | 4.37 | 2.00 | | | -1.71 | 0.09 | |
| Disseminate Findings and Knowledge Gained to All Partners | 3.40 | 1.00 | 3.80 | 2.00 | -0.89 | | | 0.37 | |

**S5. Reported Quality and Frequency of Engagement Principles among Paired Dataset**

|  | **Academic (n=18)** | | **Community (n=18)** | |
| --- | --- | --- | --- | --- |
| **Engagement Principles** | **Median** | **IQR** | **Median** | **IQR** | **z-score** | **p-value** |
| **Frequency** |  |  |  |  |  |  |
| Seek and Use the Input of Community Partners | 3.90 | 0.60 | 3.90 | 1.20 | -0.14 | 0.88 |
| Foster Co-Learning, Capacity Building, and Co-Benefit for All Partners | 3.42 | 1.33 | 3.83 | 1.83 | -1.44 | 0.15 |
| Facilitate Collaborative, Equitable Partners | 4.00 | 1.40 | 3.50 | 2.40 | 0.35 | 0.73 |
| Integrate and Achieve a Balance of All Partners | 4.13 | 1.75 | 4.75 | 1.50 | -0.42 | 0.67 |
| Involve All Partners in the Dissemination Process | 3.00 | 2.25 | 3.13 | 3.50 | -0.48 | 0.63 |
| Disseminate Findings and Knowledge Gained to All Partners | 2.60 | 1.60 | 2.90 | 2.40 | -0.89 | 0.37 |
| **Total Score** | 2.54 | 0.78 | 2.78 | 2.03 | -0.48 | 0.63 |
| **Quality** |  |  |  |  |  |  |
| Seek and Use the Input of Community Partners | 1.90 | 2.88 | 2.30 | 3.20 | -1.47 | 0.14 |
| Foster Co-Learning, Capacity Building, and Co-Benefit for All Partners | 3.00 | 0.83 | 3.50 | 2.17 | -0.95 | 0.34 |
| Facilitate Collaborative, Equitable Partners | 3.00 | 2.40 | 3.50 | 3.00 | -0.92 | 0.36 |
| Integrate and Achieve a Balance of All Partners | 2.5 | 2.25 | 2.63 | 2.75 | -1.01 | 0.31 |
| Involve All Partners in the Dissemination Process | 2.75 | 1.75 | 3.00 | 3.75 | -0.51 | 0.61 |
| Disseminate Findings and Knowledge Gained to All Partners | 2.90 | 2.60 | 3.00 | 2.60 | -0.32 | 0.75 |
| **Total Score** | 3.00 | 2.25 | 3.13 | 3.50 | -0.74 | 0.46 |

**S6: Thematic Codes for Qualitative Responses**

| **Meaningful Engagement Components: Exemplar Quotes** | **Partner Type** | **Topical Theme** |
| --- | --- | --- |
| “Our project involves staff at CBOs that work the Latinx communities, many of them share the intersecting identities we are addressing in our project: Latinx, immigrants, limited English proficiency, LGBTQ, HIV positive, underpaid/overworked. It was very important to acknowledge this and make space for our different identities and needs.” | Academic | Sociocultural Responsiveness |
| “Whether community partners and academic partners have the appropriate administrative support to facilitate grant funds, subcontracts is an important issue that should be assessed.” | Academic | Structural barriers to meaningful engagement |
| “Compensation” | Community |
| The study didn't provide enough funding, most likely, for sufficient representation [from CBO] | Academic |
| “We have had an excellent collaboration with our community partner, but one of the main challenges in this project was with the research review committee (~IRB) at our community partner's institution, which ultimately refused to approve much of our proposed work despite very low risks (e.g. qualitative interviews with providers). We felt this was due to a lack of experience with research and that it would be helpful to have infrastructure for research capacity building among community partners in EHE projects.” | Academic |
| Partners not just involved in the sharing of results, but in the analysis and interpretation of any relevant data | Academic | Research capacity among CBOs |
| "community" seems to be defined differently than our role as "community" partner” | Community | Terminology consideration |
| “I think that the ratio of collaboration to participation was skewed toward participation, but to be honest we all are working in the community it's just that some of the framework was academic and not really debated.” | Academic |
| Engagement via Zoom or other virtual platform compared to in-person engagement. I have found in-person to be much more meaningful in the community setting. | Academic | Opportunities to interact with partners |
| “Regular update presentations and feedback requests” | Community |
| “Academic partners often design unrealistic studies, that somehow pass Center/NIH review, which then have to be implemented by community partners. Community partners are often burdened with fixing these studies and/or implementing a study they could have said from the outset would not be feasible. Due to rushed timelines for supplement submissions, there is little time for this kind of constructive criticism to be provided at the design phase, leaving community members feeling obligated to participate in a burdensome and difficult research project.” | Community | Community partners workload/capacity |
| Partners not just involved in the sharing of results, but in the analysis and interpretation of any relevant data | Academic |
| We learn from each other and we are training members to change the social norms around seeking health services around HIV prevention. | Academic | Synergistic collaboration |
| “One of the keys to a successful partnership is being intentional at the beginning of the project about defining roles, responsibilities, expectations, and goals. Just saying "we want you to be equitable partners" doesn't necessarily result in a change in approach unless the structure is clearly defined.” | Community | Initial engagement dynamics |
| “May be beneficial to assess how receptive the community partner was to advice, change, receiving information, etc.” | Academic | Receptivity of community partners |
| **Trust Components: Exemplar Quotes** |
| Partners have the skill set for the task | Academic | Improving mutual understanding of research topics and methods |
| When asked, [academic partner] explained complicated or new topics in a way that is easy to understand | Community |
| Respect time of community partners (e.g., not overburdening community partners with tasks that research team could complete) | Academic | Respect for partner’s time/boundaries |

**S7: Partnership Trust: Quality**

| **Academic (n=52)** | | | | | | | | | | | | |
| --- | --- | --- | --- | --- | --- | --- | --- | --- | --- | --- | --- | --- |
| Attribute | Poor | | Fair | | Good | | Very Good | | Excellent | | Not Applicable | |
|  | n | % | n | % | n | % | n | % | n | % | n | % |
| Supportiveness | 0 | 0 | 3 | 5.8 | 4 | 7.6 | 13 | 25.0 | 32 | 61.5 | 0 | 0 |
| Accessibility | 0 | 0 | 2 | 3.9 | 10 | 19.2 | 16 | 30.8 | 24 | 46.2 | 0 | 0 |
| Dependability | 0 | 0 | 6 | 11.5 | 11 | 21.2 | 23 | 44.2 | 12 | 23.1 | 0 | 0 |
| Clear Communication | 0 | 0 | 3 | 5.8 | 6 | 11.5 | 27 | 51.9 | 16 | 30.8 | 0 | 0 |
| Mutual Benefit | 0 | 0 | 2 | 3.9 | 10 | 19.2 | 13 | 25.0 | 26 | 50.0 | 1 | 1.9 |
| Openness | 0 | 0 | 1 | 1.9 | 8 | 15.4 | 15 | 28.9 | 28 | 53.9 | 0 | 0 |
| Accuracy | 0 | 0 | 1 | 1.9 | 6 | 11.5 | 12 | 23.1 | 33 | 63.5 | 0 | 0 |
| Relationship Building | 0 | 0 | 3 | 5.8 | 7 | 13.5 | 15 | 28.9 | 26 | 50.0 | 1 | 1.9 |
| Responsibility | 1 | 1.9 | 2 | 3.9 | 7 | 13.5 | 19 | 36.5 | 23 | 44.2 | 0 | 0 |
| Sharing of power/responsibility | 1 | 1.9 | 3 | 5.8 | 11 | 21.2 | 20 | 38.5 | 17 | 32.7 | 0 | 0 |
| Truthfulness | 0 | 0 | 1 | 1.9 | 5 | 9.6 | 8 | 15.4 | 37 | 71.2 | 1 | 1.9 |
| Valuing Differences | 0 | 0 | 1 | 1.9 | 4 | 7.7 | 8 | 15.4 | 39 | 75.0 | 0 | 0 |
| **Community (n=29)** | | | | | | | | | | | | |
| Supportiveness | 0 | 0 | 2 | 6.9 | 3 | 10.3 | 7 | 24.1 | 17 | 58.6 | 0 | 0 |
| Accessibility | 1 | 3.5 | 0 | 0 | 3 | 10.3 | 5 | 17.4 | 20 | 69.0 | 0 | 0 |
| Dependability | 1 | 3.5 | 1 | 3.5 | 4 | 13.8 | 3 | 10.3 | 19 | 65.5 | 1 | 3.5 |
| Clear Communication | 0 | 0 | 2 | 6.9 | 5 | 17.2 | 5 | 17.2 | 17 | 58.6 | 0 | 0 |
| Mutual Benefit | 1 | 3.5 | 2 | 6.9 | 6 | 20.7 | 3 | 10.3 | 17 | 58.6 | 0 | 0 |
| Openness | 0 | 0 | 1 | 3.5 | 5 | 17.2 | 9 | 31.0 | 14 | 48.3 | 0 | 0 |
| Accuracy | 0 | 0 | 0 | 0 | 6 | 20.7 | 5 | 17.2 | 18 | 62.1 | 0 | 0 |
| Relationship Building | 1 | 3.5 | 1 | 3.5 | 4 | 13.8 | 4 | 13.8 | 19 | 65.5 | 0 | 0 |
| Responsibility | 0 | 0 | 1 | 3.5 | 4 | 13.8 | 7 | 24.1 | 17 | 58.6 | 0 | 0 |
| Sharing of power/responsibility | 0 | 0 | 2 | 6.9 | 7 | 24.1 | 5 | 17.2 | 15 | 51.7 | 0 | 0 |
| Truthfulness | 0 | 0 | 1 | 3.5 | 2 | 6.9 | 5 | 17.2 | 21 | 72.4 | 0 | 0 |
| Valuing Differences | 0 | 0 | 1 | 3.5 | 1 | 3.5 | 6 | 20.7 | 21 | 72.4 | 0 | 0 |

**Digital Table 6: Partnership Trust: Importance**

| **Academic (n=52)** | | | | | | | | | | | | |
| --- | --- | --- | --- | --- | --- | --- | --- | --- | --- | --- | --- | --- |
| Attribute | Not at all important | | Little Importance | | Neutral | | Important | | Very Important | | Not Applicable | |
|  | n | % | n | % | n | % | n | % | n | % | n | % |
| Supportiveness | 0 | 0% | 0 | 0% | 0 | 0% | 20 | 38.5% | 32 | 61.5% | 0 | 0% |
| Accessibility | 0 | 0% | 0 | 0% | 1 | 1.9% | 19 | 36.5% | 32 | 61.5% | 0 | 0% |
| Dependability | 0 | 0% | 0 | 0% | 2 | 3.9% | 16 | 30.8% | 34 | 65.4% | 0 | 0% |
| Clear Communication | 0 | 0% | 0 | 0% | 1 | 1.9% | 14 | 26.9% | 37 | 71.2% | 0 | 0% |
| Mutual Benefit | 0 | 0% | 0 | 0% | 0 | 0% | 23 | 44.2% | 28 | 53.9% | 1 | 1.9% |
| Openness | 0 | 0% | 0 | 0% | 1 | 1.9% | 21 | 40.4% | 30 | 57.7% | 0 | 0% |
| Accuracy | 0 | 0% | 0 | 0% | 1 | 1.9% | 16 | 30.8% | 35 | 67.3% | 0 | 0% |
| Relationship Building | 0 | 0% | 0 | 0% | 0 | 0% | 18 | 34.6% | 33 | 63.5% | 1 | 1.9% |
| Responsibility | 0 | 0% | 0 | 0% | 0 | 0% | 10 | 19.2% | 42 | 80.8% | 0 | 0% |
| Power sharing | 0 | 0% | 0 | 0% | 5 | 9.6% | 23 | 44.2% | 24 | 46.2% | 0 | 0% |
| Truthfulness | 0 | 0% | 0 | 0% | 0 | 0% | 6 | 21.3% | 43 | 82.7% | 1 | 1.9% |
| Valuing Differences | 0 | 0% | 0 | 0% | 3 | 5.8% | 6 | 11.5% | 43 | 82.7% | 0 | 0% |
| **Community (n=29)** | | | | | | | | | | | | |
| Supportiveness | 0 | 0% | 0 | 0% | 2 | 7.1% | 6 | 21.4% | 20 | 71.4% | 0 | 0% |
| Accessibility | 0 | 0% | 0 | 0% | 1 | 3.6% | 8 | 28.6% | 19 | 67.8% | 0 | 0% |
| Dependability | 0 | 0% | 0 | 0% | 0 | 0% | 8 | 28.6% | 20 | 71.4% | 0 | 0% |
| Clear Communication | 0 | 0% | 0 | 0% | 0 | 0% | 5 | 17.9% | 23 | 82.1% | 0 | 0% |
| Mutual Benefit | 0 | 0% | 0 | 0% | 1 | 3.6% | 6 | 21.4% | 21 | 75.0% | 0 | 0% |
| Openness | 0 | 0% | 0 | 0% | 1 | 3.6% | 6 | 21.4% | 21 | 75.0% | 0 | 0% |
| Accuracy | 0 | 0% | 0 | 0% | 0 | 0% | 5 | 17.9% | 23 | 82.1% | 0 | 0% |
| Relationship Building | 0 | 0% | 0 | 0% | 0 | 0% | 9 | 32.1% | 19 | 67.9% | 0 | 0% |
| Responsibility | 0 | 0% | 0 | 0% | 0 | 0% | 8 | 28.6% | 20 | 71.4% | 0 | 0% |
| Power sharing | 0 | 0% | 0 | 0% | 3 | 10.7% | 8 | 28.6% | 17 | 60.7% | 0 | 0% |
| Truthfulness | 0 | 0% | 0 | 0% | 0 | 0% | 3 | 10.7% | 24 | 85.7% | 1 | 3.6% |
| Valuing Differences | 0 | 0% | 0 | 0% | 1 | 3.6% | 3 | 10.7% | 24 | 85.7% | 0 | 0% |
